# Supplementary material for: Development of an Early Warning System for Owners Using a Validated Health-Related Quality of Life (HRQL) Instrument for Companion Animals and Its Use in a Large Cohort of Dogs
Source: Front Vet Sci. 2020 Sep 24;7:575795. doi: 10.3389/fvets.2020.575795 (PMC7541963; doi:10.3389/fvets.2020.575795)
Supplement: Supplementary file 1 [file Data_Sheet_1.xlsx]

## Sheet: Supplementary material 1.csv
Column_1	Age	E.E	H.C	A.C	C.R	In.Perfect.Health
1	old	1.57111	4.37571	3.65333	2.49333	No
2	old	1.90111	5.05714	4.275	2.42	No
3	ym	3.10667	5.92286	4.77333	2.43333	No
4	old	3.83556	5.19429	5.18667	3.50667	Yes
5	ym	3.24889	5.79429	5.31167	3.14333	No
6	old	1.89667	4.58286	4.11167	2.66667	No
7	old	3.86111	5.89571	4.66833	3.26	No
8	ym	1.86889	4.96143	5.59833	3.1	Yes
9	old	1.24333	3.67286	3.215	3.20333	No
10	old	3.05778	6	5.49	3.21667	No
11	old	1.92667	5.31286	4.82167	3.55	No
12	ym	2.89333	5.43429	5.60833	3.55	No
13	old	2.53111	5.17143	3.995	2.91333	No
14	ym	3.15667	5.08	5.80333	4.26	No
15	old	2.12778	4.12571	3.14333	3.42	No
16	old	3.63	5.69286	4.09	0.983333	No
17	ym	3.21111	4.61571	4.34167	3.97	No
18	old	2.98444	5.43714	4.94667	3.08667	No
19	old	2.20222	4.78429	3.795	2.26	No
20	old	3.46222	5.43143	4.61333	1.34667	No
21	old	2.70222	5.17571	3.99	4.08667	No
22	old	2.46222	4.31714	3.42333	2.55	No
23	old	4.06667	6	5.47	2.10333	No
24	ym	4.15333	6	6	4.26	No
25	old	2.61778	4.54	3.94833	3.37667	No
26	old	2.95222	4.66286	3.15333	3.74	No
27	old	3.71111	5.72571	4.56	3.79667	No
28	old	3.38222	5.51	5.48167	3.79667	No
29	old	3.05444	5.08714	5.46167	3.01333	No
30	ym	3.57778	6	5.66833	3.97	No
31	old	3.32	5.83	4.835	2.43333	No
32	old	1.45778	4.24143	4.56	2.78333	No
33	ym	2.39333	4.87286	4.18167	3.49333	No
34	old	3.12444	5.44	3.64333	3.62333	No
35	old	2.89333	5.54143	3.17833	3.04333	No
36	ym	3.77333	5.82	5.08	0.866667	No
37	old	3.14222	5.81429	5.165	3.55	No
38	old	1.92333	5.07	5.225	3.91333	No
39	old	2.86556	6	5.095	3.01333	No
40	old	2.96778	5.18286	4.47333	2.91333	No
41	old	2.89111	6	5.41167	4.08667	No
42	old	3.98111	6	5.685	3.84	No
43	ym	2.59667	5.28286	2.69333	2.11667	No
44	old	2.67333	4.93429	3.61667	2.66667	No
45	old	1.53222	4.51	3.50833	2.24667	No
46	old	1.93667	3.97	3.10333	1.88333	No
47	old	1.75222	4.95714	4.525	3.49333	No
48	old	2.06	3.46571	3.31167	2.52	No
49	ym	3.8	5.74286	5.58	3.79667	No
50	old	2.61556	5.14	5.49667	2.43333	No
51	ym	3.59	5.23429	3.84167	0.81	No
52	old	3.27778	5.34429	3.88833	1.72333	No
53	old	3.42444	5.59429	4.85333	3.33333	No
54	ym	4.09	5.89571	5.73333	2.94	Yes
55	ym	3.99667	6	5.56	3.84	Yes
56	ym	3.89333	6	5.36	3.39	Yes
57	ym	4.15333	6	6	4.26	Yes
58	ym	4.09333	6	5.90167	2.56333	Yes
59	old	4.15333	6	6	4.26	Yes
60	ym	3.73889	5.89571	5.70667	3.55	Yes
61	old	3.77111	5.72143	5.90167	3.14333	Yes
62	old	4.15333	6	6	3.72333	Yes
63	ym	3.28556	5.83	5.36167	1.24667	Yes
64	ym	4.15333	6	6	3.39	Yes
65	ym	4.07778	6	4.91667	2.21667	Yes
66	ym	3.95667	5.20857	5.115	2.60667	Yes
67	ym	3.58222	5.89857	5.89333	3.72333	Yes
68	ym	3.74333	6	5.85333	3.72333	Yes
69	old	2.96778	5.22857	5.80333	4.26	Yes
70	ym	3.62444	6	4.59	4.26	Yes
71	ym	3.05333	5.71571	5.62667	2.30333	Yes
72	ym	3.93222	5.90714	5.90167	3.14333	Yes
73	ym	4.01444	5.90714	6	2.81	Yes
74	ym	3.93222	6	5.90167	3.72333	Yes
75	ym	4.15333	6	6	4.26	Yes
76	ym	4.15333	6	6	4.26	Yes
77	ym	4.06667	6	6	3.18667	Yes
78	ym	4.15333	6	6	3.72333	Yes
79	old	2.11444	4.56429	4.44333	2.84	Yes
80	old	3.59778	6	5.28	3.26	Yes
81	ym	3.11	5.23714	5.60833	1.89667	Yes
82	ym	3.60667	6	5.46833	3.26	Yes
83	ym	2.01444	4.04714	3.67	3.91333	Yes
84	ym	3.33111	5.90714	5.705	3.1	Yes
85	ym	4.15333	6	6	2.36	Yes
86	ym	3.04111	5.21857	5.18167	2.72333	Yes
87	ym	4.15333	6	6	2.85333	Yes
88	old	3.46111	5.82143	5.62833	3.97	Yes
89	ym	4.15333	5.39143	6	4.26	Yes
90	ym	4.15333	5.39143	6	4.26	Yes
91	ym	4.15333	6	6	4.26	Yes
92	ym	3.91	6	6	3.97	Yes
93	ym	4.15333	6	5.62	4.26	Yes
94	ym	4.15333	6	6	3.39	Yes
95	ym	3.84111	6	5.90167	3.43333	Yes
96	ym	4.15333	6	6	2.36	Yes
97	ym	3.79111	5.69857	5.47	3.22	Yes
98	old	4.15333	6	6	3.14333	Yes
99	ym	3.50444	5.80286	5.90167	3.72333	Yes
100	ym	3.43444	5.15429	5.81333	1.69333	Yes
101	old	3.90778	5.92286	5.91167	1.65	Yes
102	ym	4.15333	6	6	2.85333	Yes
103	old	4.15333	6	6	1.28667	Yes
104	old	3.93222	6	5.90167	2.65	Yes
105	old	3.18333	6	5.67667	3.97	Yes
106	ym	4.15333	6	5.45333	1.53333	Yes
107	ym	4.15333	5.90714	6	1.57667	Yes
108	old	3.35556	5.49	5.46167	2.14333	Yes
109	ym	3.77667	5.92286	5.90167	2.89667	Yes
110	ym	4.15333	6	6	4.26	Yes
111	ym	4.15333	6	6	4.26	Yes
112	ym	4.15333	6	6	2.81	Yes
113	ym	3.67889	6	5.90167	3.72333	Yes
114	old	3.88667	6	5.48167	4.26	Yes
115	old	4.09333	5.27286	5.28167	3.68	Yes
116	ym	3.54222	6	5.705	4.26	Yes
117	ym	4.15333	6	4.64	3.43333	Yes
118	old	4.15333	5.89714	6	3.43333	Yes
119	ym	4.15333	6	6	4.26	Yes
120	ym	4.15333	6	6	4.26	Yes
121	ym	4.15333	6	6	4.26	Yes
122	ym	4.15333	6	6	3.72333	Yes
123	old	1.45556	4.87429	3.82	3.66667	Yes
124	ym	4.09333	6	5.90167	3.1	Yes
125	ym	4.15333	5.89571	6	3.97	Yes
126	ym	4.15333	6	6	4.26	Yes
127	ym	4.15333	6	6	3.72333	Yes
128	ym	3.96333	6	6	3.14333	Yes
129	ym	3.87667	6	6	3.97	Yes
130	ym	4.07778	5.89857	6	3.14333	Yes
131	ym	3.05667	5.28429	4.145	3.91333	Yes
132	ym	3.60889	6	5.90167	4.26	Yes
133	ym	1.98889	4.40429	3.775	3.91333	Yes
134	ym	3.86	5.52143	5.89333	3.72333	Yes
135	ym	3.41444	5.05429	5.04	2.72333	Yes
136	old	3.22111	5.33429	5.715	3.84	Yes
137	old	3.68556	5.89571	5.775	4.26	Yes
138	ym	3.92111	6	5.18667	3.26	Yes
139	ym	3.81333	6	6	3.43333	Yes
140	ym	3.94889	5.89571	5.90167	2.31667	Yes
141	ym	4.07778	5.89571	6	2.65	Yes
142	ym	4.15333	6	6	4.26	Yes
143	ym	3.78778	5.80286	5.90167	2.65	Yes
144	ym	3.35	5.12714	5.91167	2.18667	Yes
145	ym	4.06556	5.39143	5.36	2.60667	Yes
146	ym	3.98111	5.71714	5.805	1.40333	Yes
147	ym	3.71111	5.72714	5.675	3.97	Yes
148	ym	2.91556	5.62571	5.46	3.55	Yes
149	ym	4.15333	6	6	4.26	Yes
150	old	3.96	6	6	2.40333	Yes
151	ym	4.07222	6	5.91167	2.18667	Yes
152	ym	4.00222	6	6	3.68	Yes
153	old	3.24	5.26571	5.71667	3.91333	No
154	old	1.43	3.5	4.124	2.40667	No
155	ym	1.88889	4.35	4.155	2.71	No
156	ym	2.46333	5.04286	3.43	3.91333	No
157	old	3.56667	5.79143	6	4.26	No
158	ym	0.336667	2.64833	3.13333	1.45	No
159	old	1.19222	3.86857	2.85667	1.75333	No
160	old	2.77444	5.64	5.43	3.91333	No
161	old	2.82778	5.81429	5.705	4.01333	No
162	ym	2.78444	5.28143	5.38167	3.27333	No
163	old	3.79333	6	5.41	4.26	No
164	old	1.97	4.77286	5.39167	3.55	No
165	old	0.776667	3.58286	3.96	0.883333	No
166	ym	4.07778	6	6	4.26	No
167	old	2.88333	5.89571	5.11	4.08667	No
168	old	2.75333	5.22	5	3.66667	No
169	old	1.32778	4.01143	4.03333	2.88333	No
170	old	1.28444	5.235	5.06667	3.79667	No
171	old	2.42778	5.51143	4.375	3	No
172	ym	2.76111	4.53857	4.43167	2.82667	No
173	ym	4.15333	5.89571	6	4.26	No
174	old	2.65444	3.7	3.64167	2.95667	No
175	ym	1.51556	4.71714	4.46667	2.29	No
176	ym	4.06556	5.71571	5.685	4.08667	No
177	old	3.31444	5.33	5.36167	3.55	No
178	old	3.73667	5.50571	5.48167	2.72333	No
179	old	3.48444	5.43429	5.52	3.84	No
180	ym	0.987778	3.55429	4.64833	2.46333	No
181	old	4.15333	6	6	4.26	No
182	ym	0.646667	2.67857	3.36667	0.87	No
183	old	0.535556	3.88714	3.64333	2.78333	No
184	old	2.66222	5.17714	4.46667	2.81	No
185	old	2.54444	5.43429	4.62667	2.42	No
186	old	2.78111	5.27	5.43	3.37667	No
187	old	4.15333	6	6	4.26	No
188	ym	1.94778	4.21	4.88167	3.34667	No
189	old	3.11556	5.65	5.38333	4.08667	No
190	old	1.55222	4.74429	4.01	2.42	No
191	ym	3.52556	6	5.30667	3.62333	No
192	old	3.03111	5.32143	4.13667	2.47667	No
193	old	2.14444	5.64571	4.945	3.76667	No
194	old	1.59111	5.14143	3.795	2.24667	No
195	old	2.02556	5.15	3.45833	2.49333	No
196	old	2.31444	4.20714	3.16667	2.66667	No
197	old	2.12333	5.24	3.50667	2.20333	No
198	old	1.07111	5.30429	3.29667	2.49333	No
199	old	3.82333	6	5.61833	3.66667	No
200	old	1.21111	4.59714	3.43	3.32	No
201	old	2.56111	5.91286	4.795	3.13	No
202	old	2.31	4.59714	3.35333	2.20333	No
203	old	2.50333	4.26	2.88167	2.03	No
204	old	2.82333	5.71286	5.11667	2.97	No
205	old	1.93667	4.56714	3.49667	2.95667	No
206	ym	2.46333	4.85429	4.00833	2.13	No
207	old	2.83889	5.68714	3.675	3.66667	No
208	ym	3.44667	6	5.58667	1.94	No
209	old	2.02556	5.34714	5.18667	3.01333	No
210	old	2.04333	5.42143	4.78333	2.42	No
211	ym	2.72444	5.72714	4.23	3.55	No
212	old	1.58778	4.46571	3.00167	2.24667	No
213	old	2.03111	5.29571	3.49667	3.49333	No
214	old	2.29222	4.99857	3.95667	3.13	No
215	old	1.94778	5.71286	3.26167	3.56667	No
216	old	1.08444	3.91714	2.10667	1.07333	No
217	ym	2.28889	5.33857	3.76	2.66667	No
218	ym	3.14333	4.91714	5.19667	1.72333	No
219	old	1.43	5.05429	3.95833	2.75333	No
220	old	2.81444	6	4.59167	3.26	No
221	old	1.78444	4.98429	2.79	2.49333	No
222	old	2.48889	5.54429	4.055	2.95667	No
223	ym	1.56222	4.03	4.15	3	No
224	old	3.13778	5.82	4.155	2.30333	No
225	ym	1.95667	5.14429	3.34333	1.84	No
226	old	1.05444	4.03143	3.20167	2.24667	No
227	old	1.95222	5.20571	3.81	2.13	No
228	old	2.22667	5.6	3.96	2.66667	No
229	old	1.94667	4.59571	4.025	3.13	No
230	old	2.28889	4.80429	4.115	2.91333	No
231	old	2.20111	5.27429	4.38167	3.66667	No
232	ym	1.51111	4.88714	2.55667	3.27667	No
233	old	1.78667	4.33571	3.02167	3.84	No
234	old	1.23667	3.71429	2.86	2.85667	No
235	old	1.77778	4.79429	3.275	2.24667	No
236	old	1.63889	4.70857	4.02833	2.34667	No
237	old	1.78333	4.08429	3.00833	2.24667	No
238	old	3.39	4.73857	4.50667	3.84	No
239	old	2.15444	5.16714	3.99333	2.47667	No
240	old	3.14333	5.63429	4.43167	3.20333	No
241	old	3.56889	6	5	3.08667	No
242	ym	2.2	5.30714	3.60333	2.95667	No
243	ym	1.84333	5.71286	4.57167	3.49333	No
244	old	1.94556	4.40571	4.035	2.42	No
245	old	2.08444	4.57	3.96833	2.71	No
246	ym	3.13333	5.59143	2.83833	2.74	No
247	old	2.19111	4.70143	3.85	3.20333	No
248	old	2.81444	5.58286	3.75167	2.30333	No
249	old	1.85222	3.62143	3.35167	1.95667	No
250	old	1.66	5.03714	4.39	1.59333	No
251	ym	1.86556	4.19286	2.94167	2.75333	No
252	old	2.07111	5.16429	3.83167	2.84	No
253	old	2.57778	5.53286	4.00667	1.95667	No
254	old	2.57111	5.25714	3.81833	3.13	No
255	ym	2.07556	5.04571	4.27	2.17333	No
256	old	2.63222	5.40857	3.56833	2.95667	No
257	ym	1.23444	4.14	3.81833	3.24667	No
258	old	3.91667	5.70857	5.5	4.26	No
259	old	3.18	5.43429	5.26333	3.55	No
260	ym	3.18556	5.53	4.82667	4.08667	No
261	old	1.75889	4.98429	4.54667	4.08667	No
262	old	3.00111	5.89571	3.035	3.56667	No
263	old	2.94667	5.35143	4.265	2.62333	No
264	old	2.22333	4.49143	4.02833	2.01333	No
265	old	2.04222	4.95571	4.06833	2.13	No
266	old	3.00889	4.43143	3.94167	1.95667	No
267	ym	2.93222	5.63571	3.52667	2.75333	No
268	old	1.39889	4.25143	3.79	2.66667	No
269	old	1.35444	3.81286	3.61667	2.95667	No
270	old	3.25667	4.73714	3.305	2.66667	No
271	old	1.86222	3.77429	2.32667	3.42	No
272	old	3.16111	5.63571	5.87167	4.26	No
273	old	2.65444	4.98143	3.9	2.87	No
274	old	2.36667	5.31714	5.22167	4.26	No
275	old	2.26222	5.2	2.33167	2.85667	No
276	old	3.08333	5.90714	4.955	4.26	No
277	old	2.27	4.51143	3.56333	3.55	No
278	old	3.23778	5.68714	4.25667	3.30333	No
279	old	1.71333	4.69429	2.78333	2.21667	No
280	old	1.92333	4.36714	3.05833	2.66667	No
281	old	2.16222	4.25714	5.16667	3.26	No
282	old	2.13667	4.65571	2.99667	3.24667	No
283	old	2.09889	4.79571	3.74167	1.95667	No
284	old	2.77333	5.21429	4.33167	2.68	No
285	old	2.49	5.22429	5.705	4.26	No
286	old	1.50444	5.46143	3.13333	2.29	No
287	old	3.28667	5.32857	4.08	2.68	No
288	old	2.06778	5.08857	3.195	0.883333	No
289	old	1.80222	3.39571	2.065	2.48	No
290	old	2.03333	5.41286	3.24	3.74	No
291	old	2.41556	4.16429	4.03833	3.37667	No
292	old	2.15889	5.56429	5.615	3.55	No
293	old	2.12667	3.75143	3.43667	1.71	No
294	old	1.54444	3.97857	3.985	1.95667	No
295	old	1.89333	3.51143	2.54167	2.04333	No
296	old	1.87444	3.47143	2.94333	2.75333	No
297	old	1.98778	3.53714	2.74667	3.32	No
298	old	2.91	5.61	4.02833	2.33333	No
299	old	2.08	3.58571	2.82833	3.20333	No
300	old	1.88333	3.76571	2.37333	0.666667	No
301	old	2.42	5.22143	3.235	3.52	No
302	old	3.71333	6	5.035	1.11333	No
303	old	1.42	3.52143	3.145	2.65333	No
304	old	2.83111	5.34	4.985	2.97	No
305	old	1.94	4.06286	2.64	1.95667	No
306	old	3.02444	5.79714	3.42833	3.49333	No
307	old	3.77333	6	6	3.72333	No
308	old	1.58111	3.56143	2.78667	2.45	No
309	old	3.56222	5.80571	4.435	2.56333	No
310	old	1.89444	4.49429	4.29333	3.66667	No
311	old	2.14444	2.96429	3.11167	2.36333	No
312	old	2.34889	4.35143	5.46	2.19	No
313	old	2.17889	4.09714	4.54	1.47667	No
314	old	2.01778	4.36571	2.73833	3.74	No
315	old	2.64111	5.36286	3.80167	1.79667	No
316	old	3.09333	5.52429	4.53333	4.08667	No
317	old	1.48778	4.54	3.86167	2.66667	No
318	old	2.92	4.48286	4.61667	2.50667	No
319	old	2.22667	4.75857	3.13333	3.74	No
320	old	3.55556	5.90714	5.10167	4.08667	No
321	old	2.68778	4.85429	5.08	2.65	No
322	old	2.57222	4.51571	3.27667	3.76667	No
323	old	2.42333	4.17286	3.20167	2.91333	No
324	old	1.89111	4.75	4.07833	3.84	No
325	old	2.59444	4.99	4.77667	3.08667	No
326	old	2.48889	5.80571	3.86	3.42	No
327	old	3.25111	5.03714	3.86167	2.84	No
328	old	1.22	3.69429	3.20667	1.98667	No
329	old	3.10333	5.22286	4.515	3.84	No
330	old	1.15556	2.73143	2.64	0.883333	No
331	old	2.31222	6	4.94333	3.84	No
332	old	2.87	4.81286	3.11167	2.78333	No
333	old	1.44556	3.24857	3.28	1.71	No
334	old	1.87222	4.47714	3.40667	3.49333	No
335	old	2.3	5.79143	3.565	3.20333	No
336	old	2.56889	5.51	3.99333	3.84	No
337	old	2.05889	5.43143	4.72	4.26	No
338	old	2.93333	5.59714	3.56333	3.37667	No
339	old	2.12667	3.67286	3.32667	2.95667	No
340	old	2.41111	4.74714	3.27333	3.13	No
341	old	2	4.10857	3.83	3.97	No
342	old	2.78	4.80429	2.635	2.03	No
343	old	2.43	5.22571	5.585	3.01333	No
344	old	2.07111	4.79714	3.61667	4.08667	No
345	old	2.00556	5.47857	3.49833	3.49333	No
346	old	1.42111	2.88857	2.65833	3.27667	No
347	old	3.06667	6	5.78167	3.55	No
348	old	2.44444	5.49857	4.23667	3.33333	No
349	old	1.67222	3.93143	2.935	3.07333	No
350	old	1.98333	4.05429	3.03333	1.30333	No
351	old	2.12222	3.59	4.17667	3.30333	No
352	old	2.48111	3.44714	4.30333	2.29	No
353	old	2.86889	5.18571	3.58667	3.49333	No
354	old	2.05111	3.67714	2.35667	2.29	No
355	old	0.928889	3.95429	2.90667	0.346667	No
356	old	2.56889	5.24143	4.85667	3.84	No
357	old	2.08111	5.43857	2.86667	2.40667	No
358	old	1.66778	4.68286	3.69	2.37667	No
359	old	1.96556	5.21	3.185	3.05667	No
360	old	2.59444	5.32429	3.19333	3.08667	No
361	old	2.64333	3.53571	3.40667	3.13	No
362	old	3.33889	5.70286	5.23833	2.68	No
363	old	3.20333	5.62714	5.57667	3.50667	No
364	old	1.84222	3.78	2.61	2	No
365	old	3.672	5.89614	5.81267	3.503	Yes
366	ym	3.58044	6	5.81267	3.255	Yes
367	ym	3.94025	6	6	3.96367	Yes
368	ym	3.73811	6	6	3.96367	Yes
369	ym	3.25044	4.99771	5.81267	3.79133	Yes
370	ym	2.44344	5.65343	5.438	3.19867	Yes
371	ym	3.25433	6	5.65683	3.96367	Yes
372	old	1.9155	4.98229	5.63467	2.95067	Yes
373	old	1.98225	4.94414	5.02883	3.33067	Yes
374	ym	3.47544	6	5.6175	3.33067	Yes
375	ym	4.05133	6	6	4.252	Yes
376	ym	3.13722	5.25471	5.32783	2.40933	Yes
377	ym	3.92689	5.29929	5.90167	4.252	Yes
378	ym	3.31811	5.91343	5.71433	3.007	Yes
379	ym	3.04478	5.81571	5.77567	3.71567	Yes
380	ym	3.82622	6	5.911	3.54333	Yes
381	ym	3.66078	6	5.90167	3.96367	Yes
382	ym	3.29911	6	6	3.21967	Yes
383	old	3.55033	5.63329	5.822	2.83467	Yes
384	ym	3.465	5.82129	5.48217	3.54333	Yes
385	old	3.81467	5.10643	6	3.67533	Yes
386	ym	3.90033	6	6	4.252	Yes
387	ym	3.82622	5.697	5.911	1.894	Yes
388	old	3.99156	6	5.90167	4.004	Yes
389	old	3.99156	6	5.90167	4.004	Yes
390	ym	4.148	6	6	3.96367	Yes
391	ym	3.30089	5.72914	5.705	3.783	Yes
392	ym	3.45667	5.51271	5.81267	2.96667	Yes
393	ym	3.65022	5.35686	5.6175	3.33067	Yes
394	ym	4.00889	6	5.911	3.54333	Yes
395	ym	4.148	6	6	2.56233	Yes
396	ym	3.58543	6	5.466	2.232	Yes
397	ym	4.148	6	6	4.252	Yes
398	ym	4.148	6	6	4.252	Yes
399	ym	3.43589	6	6	4.252	Yes
400	ym	4.07267	5.19814	6	2.891	Yes
401	ym	3.988	6	6	4.252	Yes
402	ym	4.08822	6	5.90167	3.387	Yes
403	ym	3.44722	6	6	4.252	Yes
404	ym	3.92689	6	5.02267	3.96367	Yes
405	ym	2.94556	5.82129	5.51767	4.07967	Yes
406	ym	3.81467	6	6	3.09867	Yes
407	old	2.38	4.51771	4.319	2.58667	Yes
408	ym	3.80367	6	6	3.756	Yes
409	ym	3.32244	5.64257	5.90167	3.71567	Yes
410	ym	3.97133	5.91343	5.59633	3.371	Yes
411	ym	4.148	6	6	4.252	Yes
412	ym	4.148	6	6	3.96367	Yes
413	ym	4.148	6	5.89383	2.81033	Yes
414	old	3.776	5.82286	5.76783	3.96367	Yes
415	ym	3.82389	6	5.90167	3.42733	Yes
416	ym	3.89	6	6	4.252	Yes
417	ym	3.87311	5.48057	5.03933	3.90733	Yes
418	ym	4.148	6	6	4.252	Yes
419	ym	4.148	5.39143	6	4.252	Yes
420	ym	3.12289	6	5.119	3.42733	Yes
421	ym	2.7	5.72914	5.7915	3.54333	Yes
422	ym	2.97244	5.89857	5.58833	4.07967	Yes
